# Supplementary material for: Synthesis of [POCOP]-pincer iron and cobalt complexes via Csp3–H activation and catalytic application of iron hydride in hydrosilylation reactions
Source: Royal Society of Chemistry journal article supplement (doi:10.1039/c5ra00072f), 2015-01-01
Supplement: c5ra00072f1.pdf [file c5ra00072f1.pdf]

## Supporting Information

### Synthesis of [POCOP]-Pincer Iron and Cobalt Complexes via C<sub>sp3</sub>-H Activation and Catalytic Application of Iron Hydride in Hydrosilylation Reactions

Shaofeng Huang,<sup>a</sup> Hua Zhao,<sup>a</sup> Hongjian Sun, Lin Wang, Xiaoyan Li\*

*School of Chemistry and Chemical Engineering, Key Laboratory of Special  
Functional Aggregated Materials, Ministry of Education, Shandong University,  
Shanda Nanlu 27, 250199 Jinan, People's Republic of China*

#### Table of Contents

|                                                                                     | Page |
|-------------------------------------------------------------------------------------|------|
| IR and NMR spectra of complexes <b>2</b> , <b>3</b> , <b>4</b> , and <b>5</b> ..... | S2   |
| NMR data for the alcohol products.....                                              | S8   |
| Magnetic susceptibility of complex <b>3</b>                                         | S23  |

## IR and NMR spectra of complexes 2, 3, 4, and 5

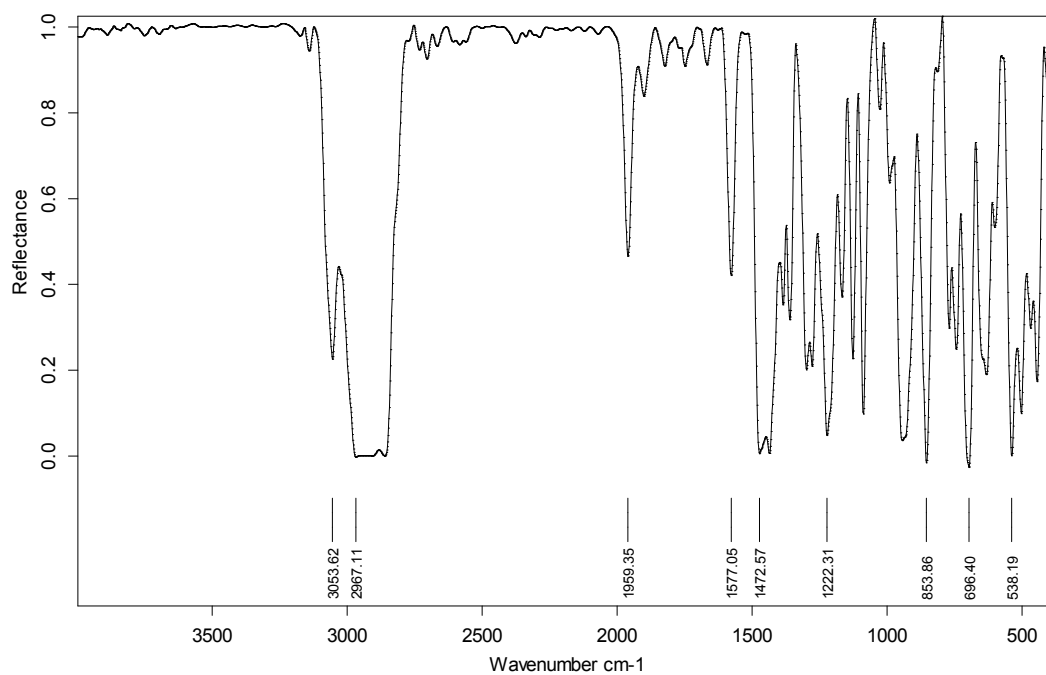

IR spectrum of complex 2

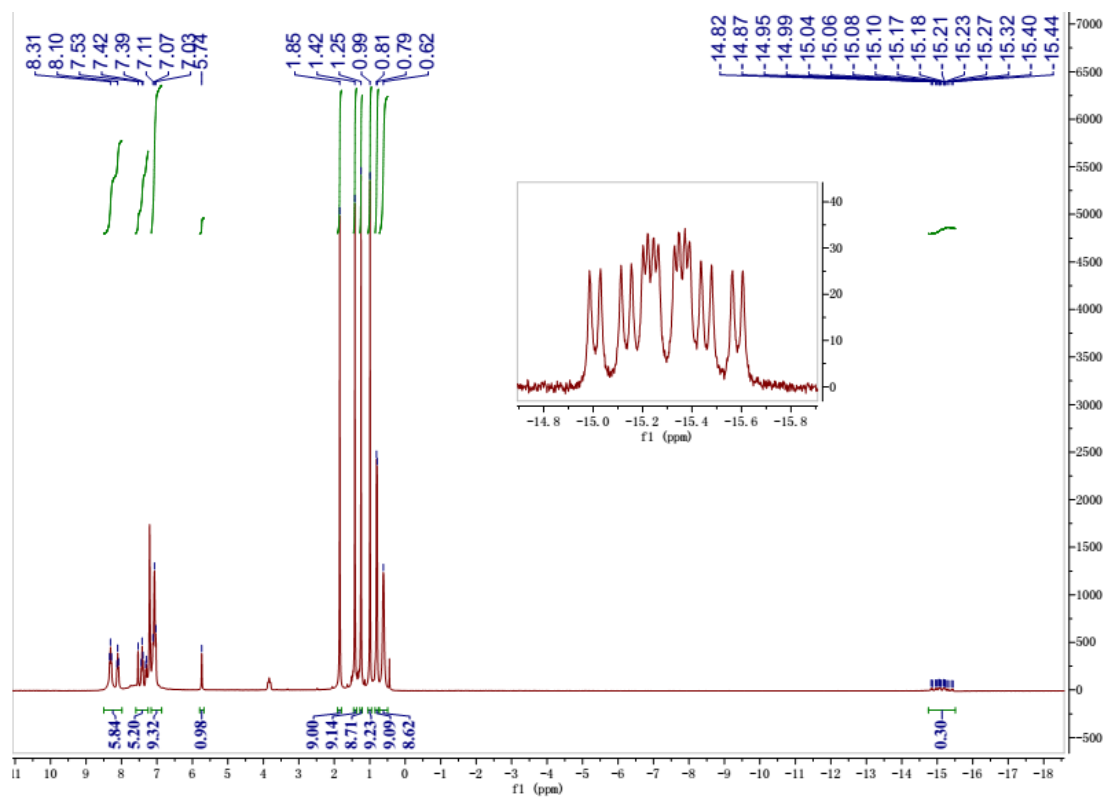

<sup>1</sup>H NMR spectrum of complex 2

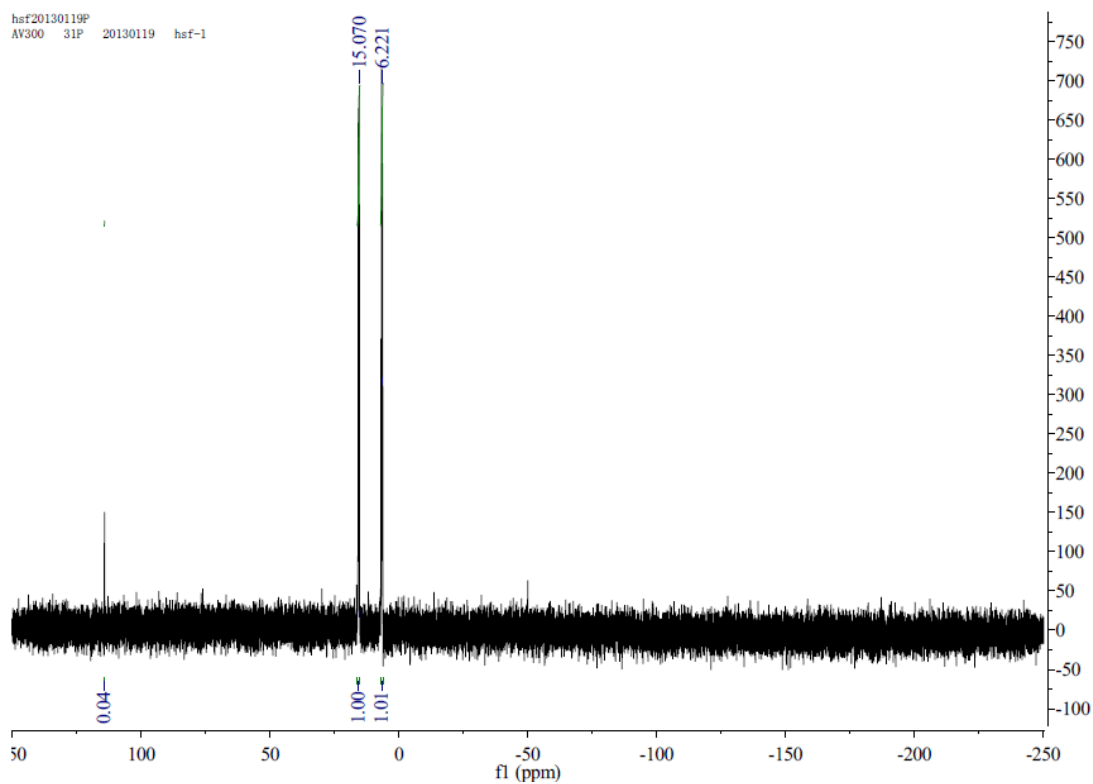

Amplification:

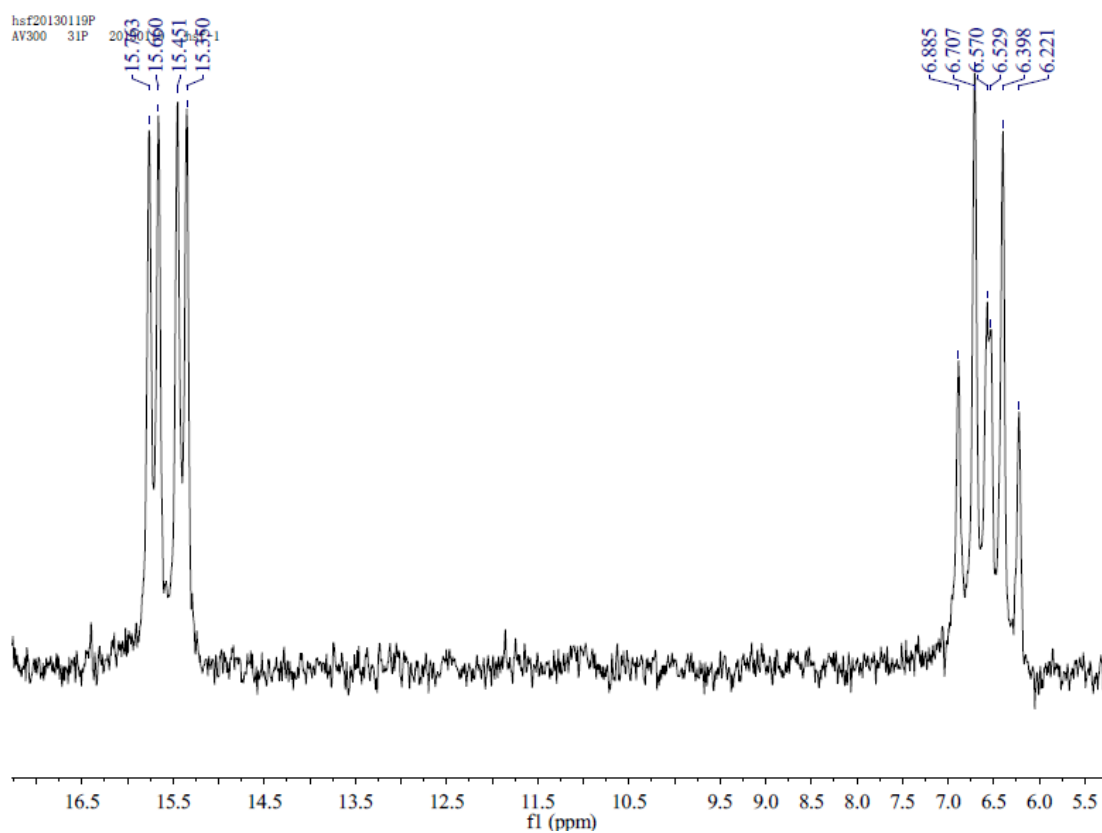

$^{31}\text{P}\{^1\text{H}\}$  NMR spectrum of complex **2**

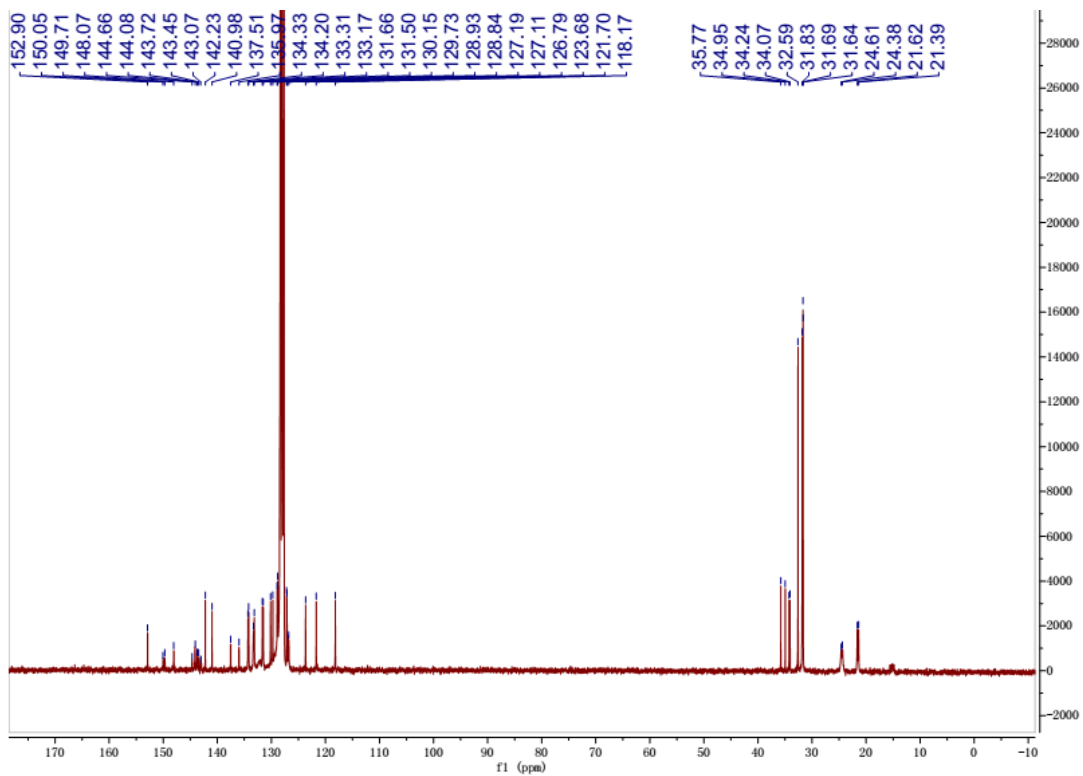

$^{13}\text{C}$  NMR spectrum of complex 2

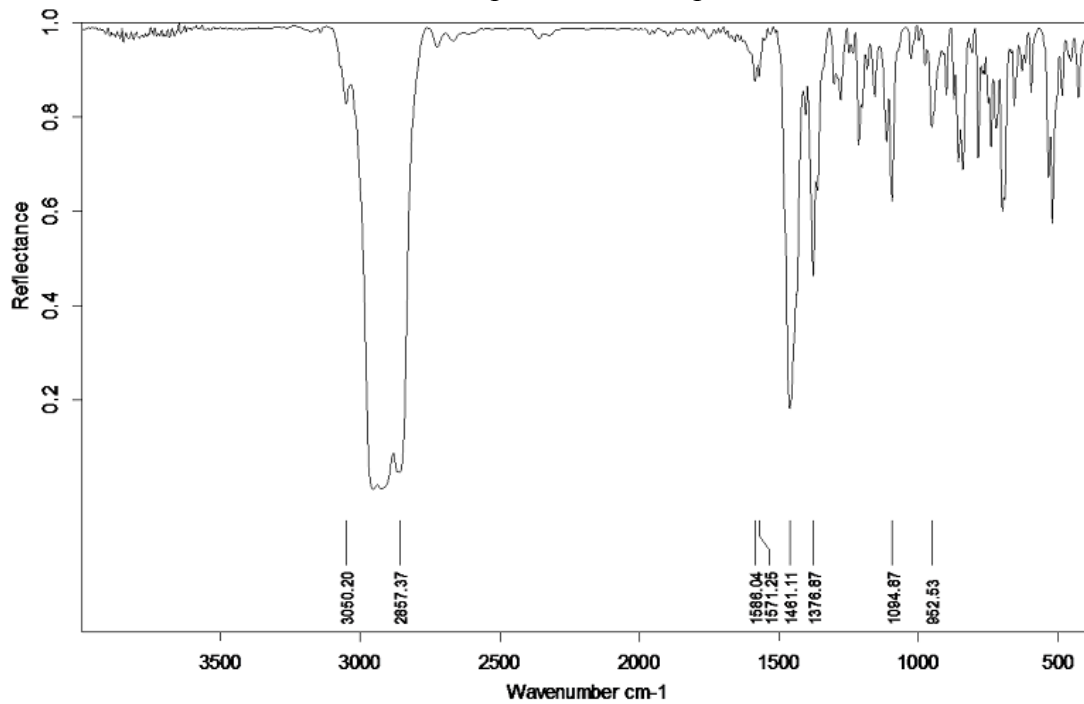

IR spectrum of complex 3

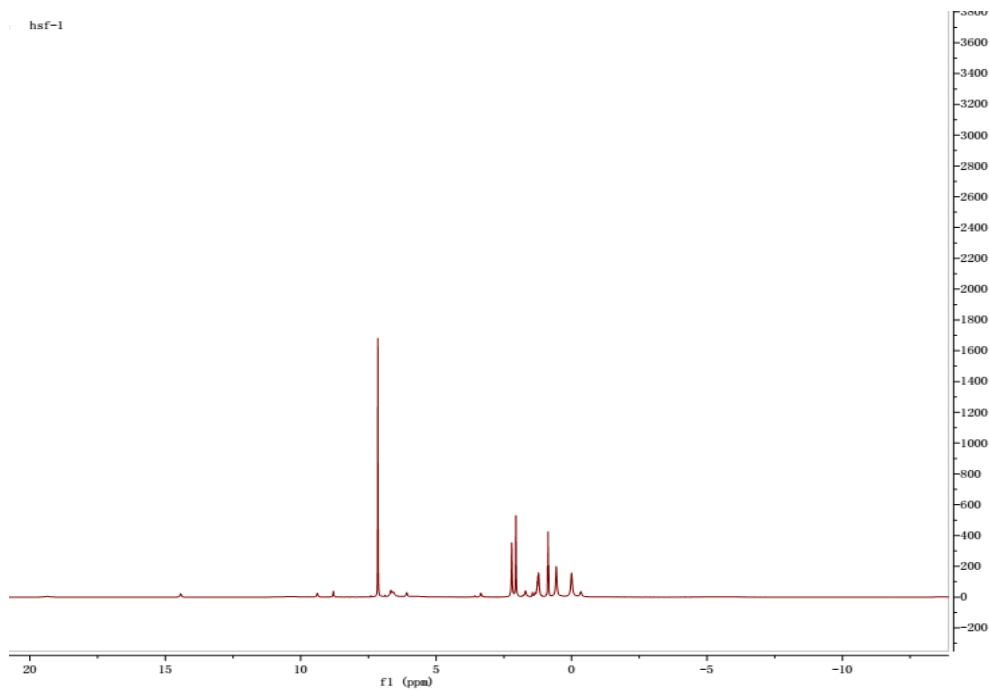

<sup>1</sup>H NMR spectrum of complex **3**

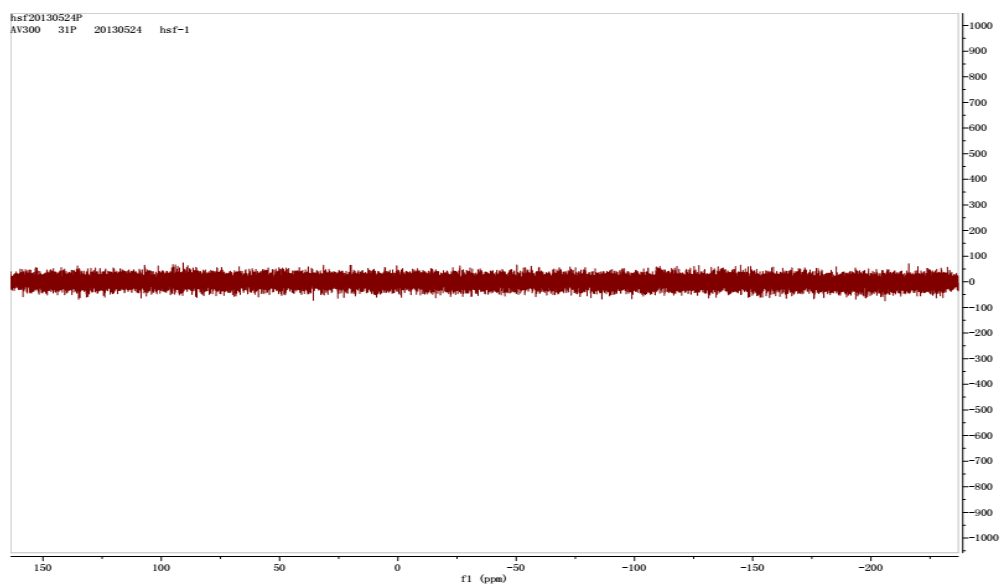

<sup>31</sup>P{<sup>1</sup>H} NMR spectrum of complex **3**

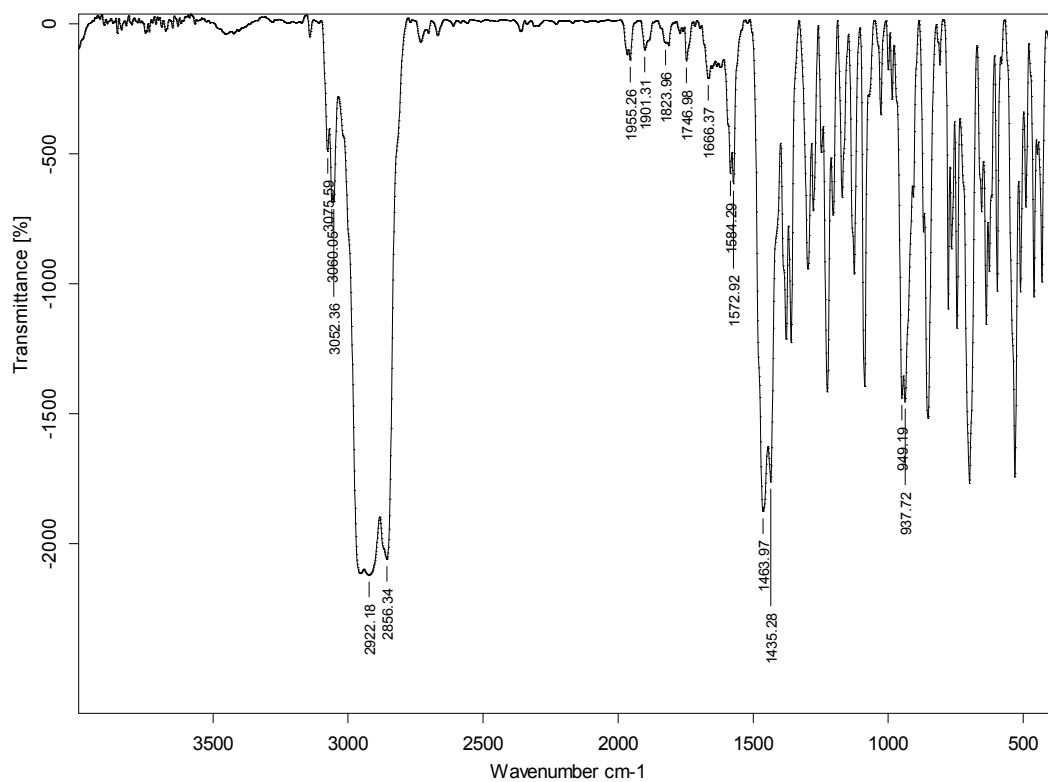

IR spectrum of complex 4

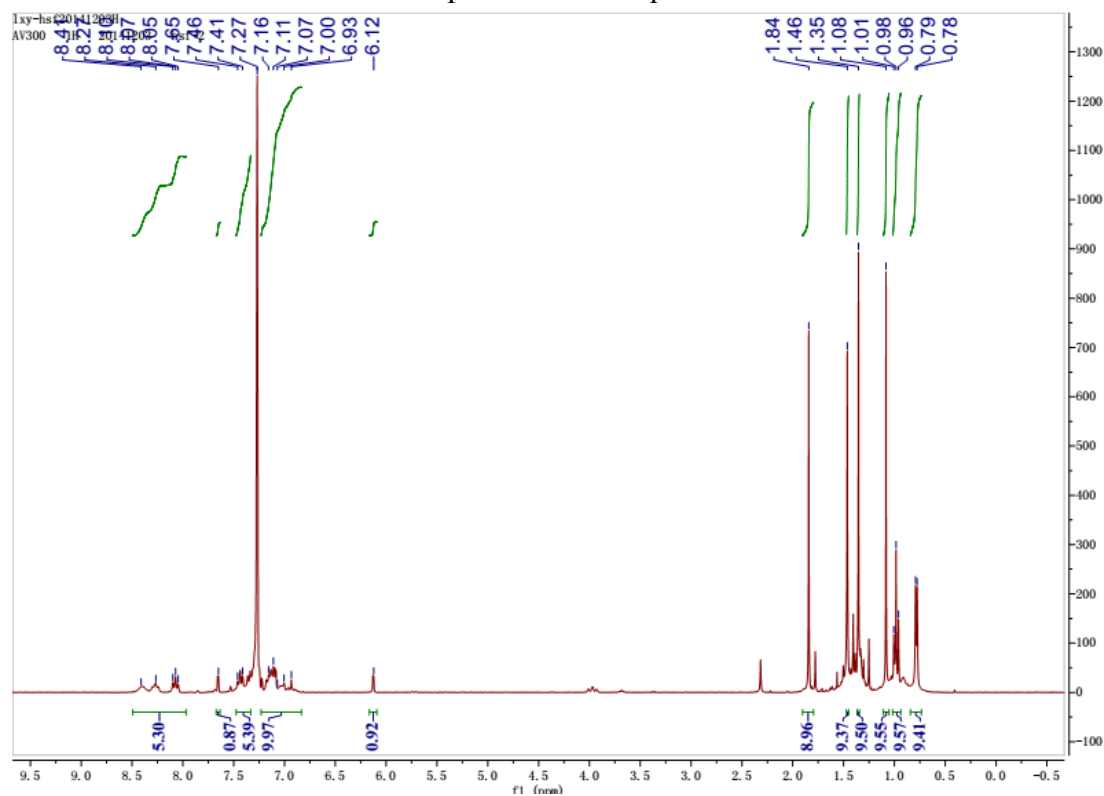

<sup>1</sup>H NMR spectrum of complex 4

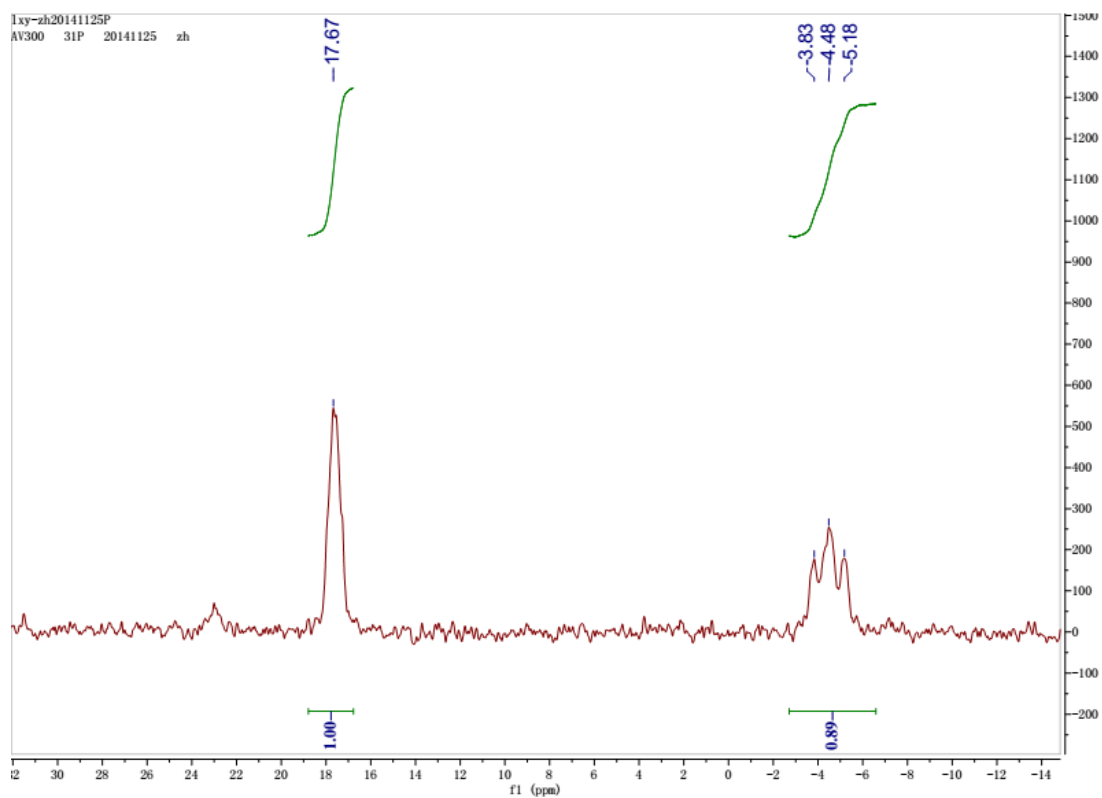

$^{31}\text{P}\{^1\text{H}\}$  NMR spectrum of complex 4

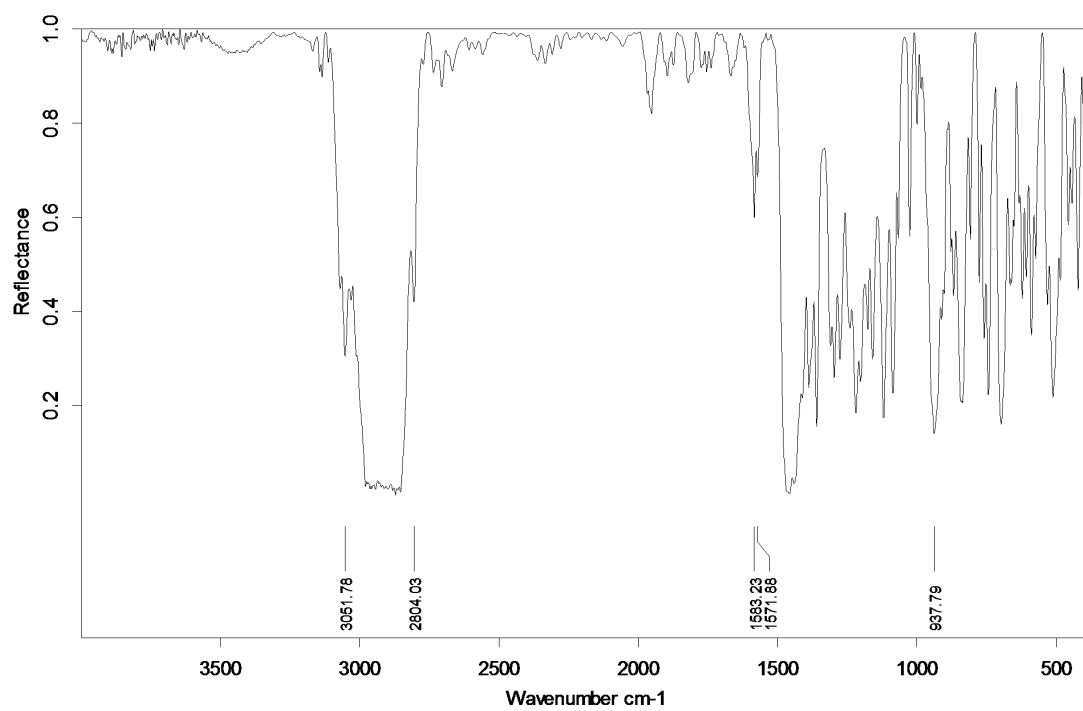

IR spectrum of complex 5

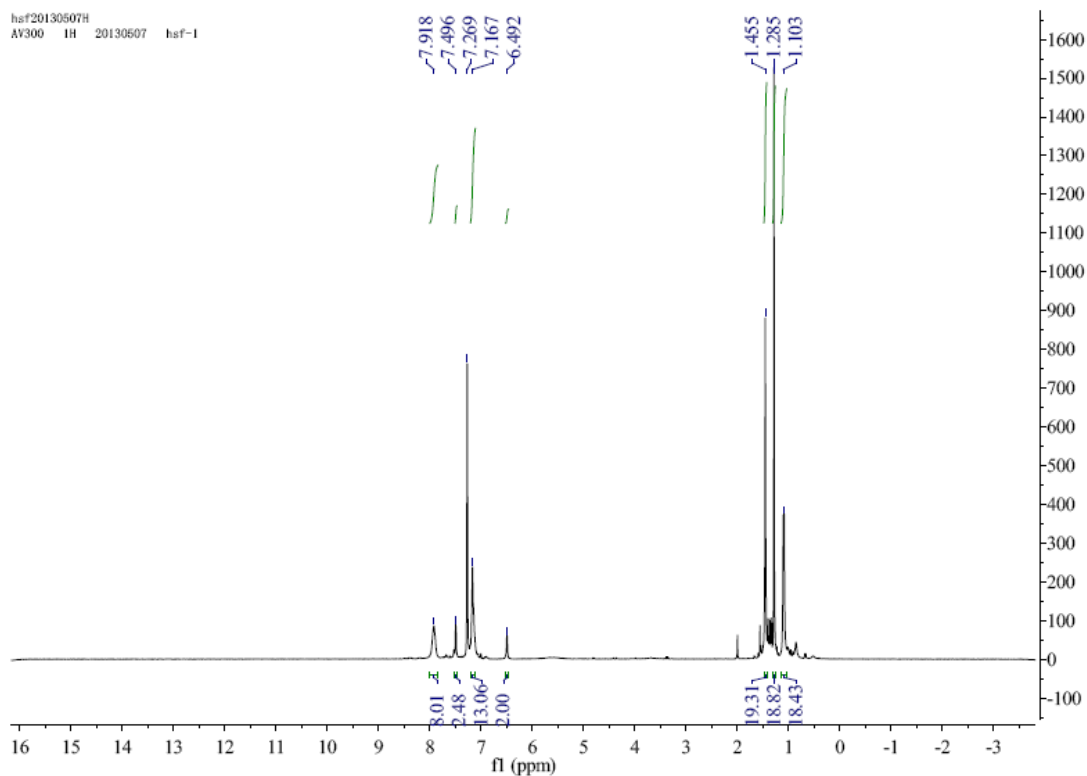

$^1\text{H}$  NMR spectrum of complex **5**

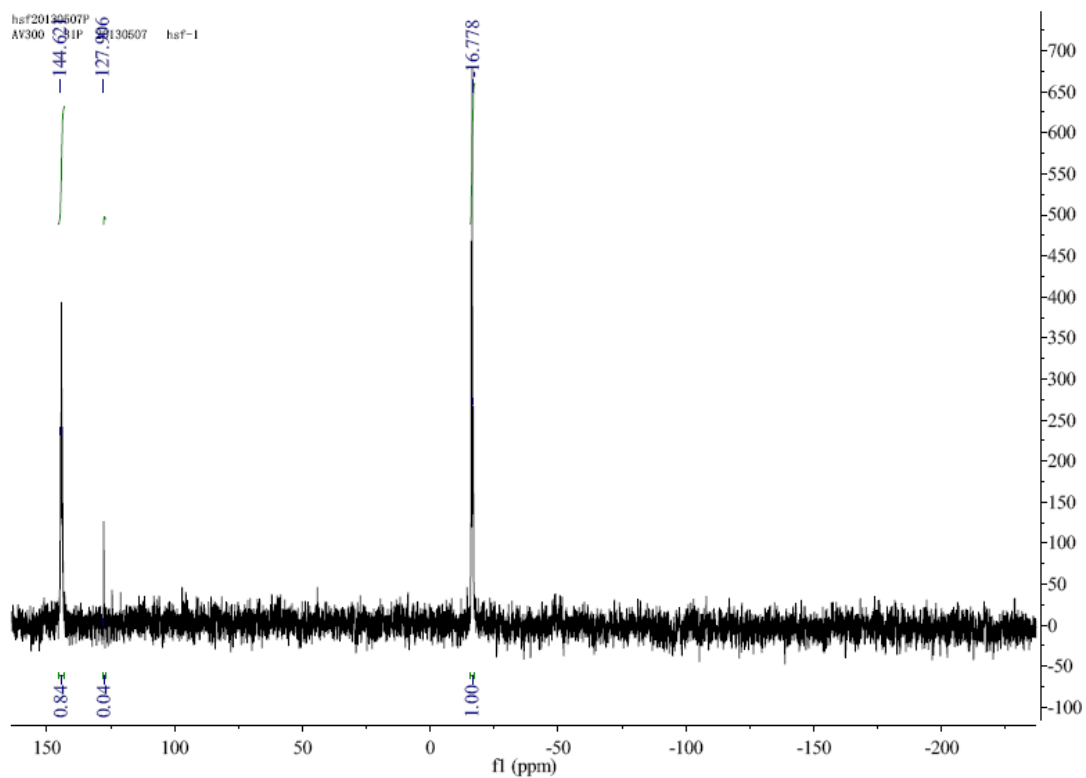

$^{31}\text{P}\{^1\text{H}\}$  NMR spectrum of complex **5**



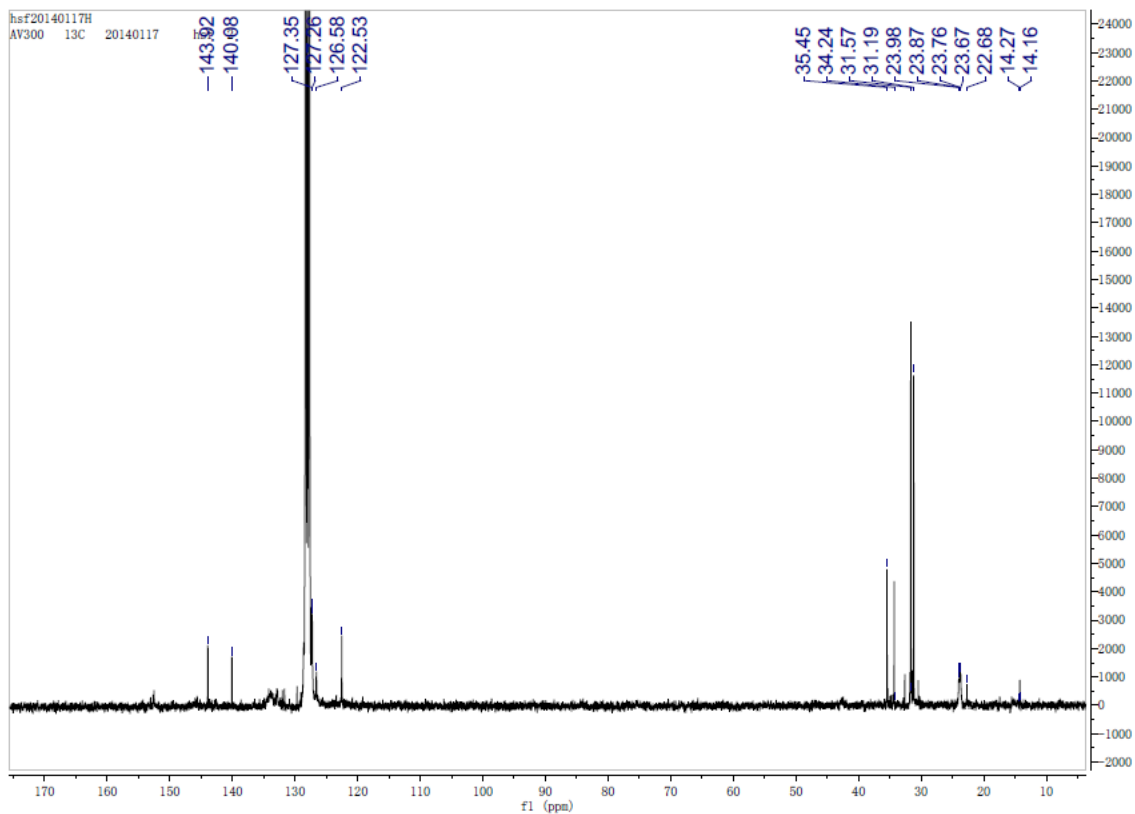

$^{13}\text{C}$  NMR spectrum of complex **5**

**•NMR data for the alcohol products**

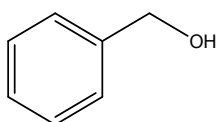

$^1\text{H}$  NMR (300 MHz,  $\text{CDCl}_3$ ,  $\delta$ ): 7.35–7.25 (m, *Ar*, 5H), 4.57 (s,  $\text{CH}_2$ , 2H), 2.67 (s br, *OH*, 1H).

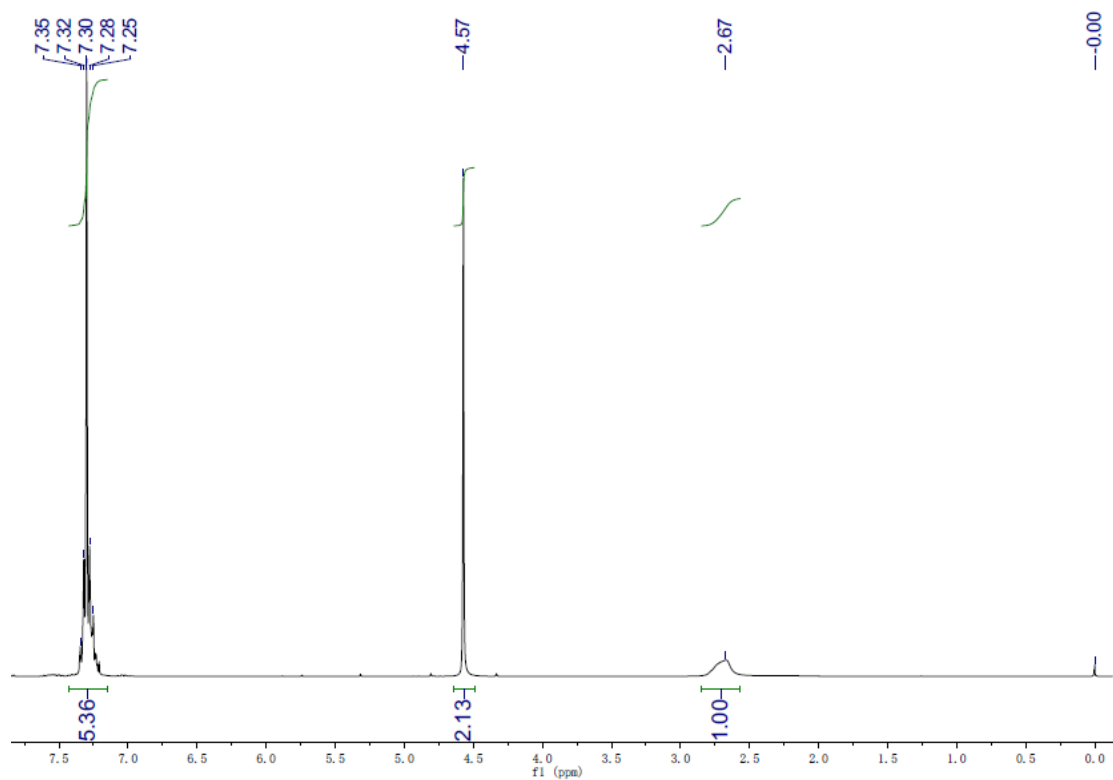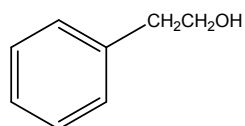

<sup>1</sup>H NMR (300 MHz, CDCl<sub>3</sub>, δ): 7.31–7.18 (m, *Ar*, 5H), 3.78 (t, *CH*<sub>2</sub>, 2H), 2.81 (t, *CH*<sub>2</sub>, 2H), 2.10 (s br, *OH*, 1H).

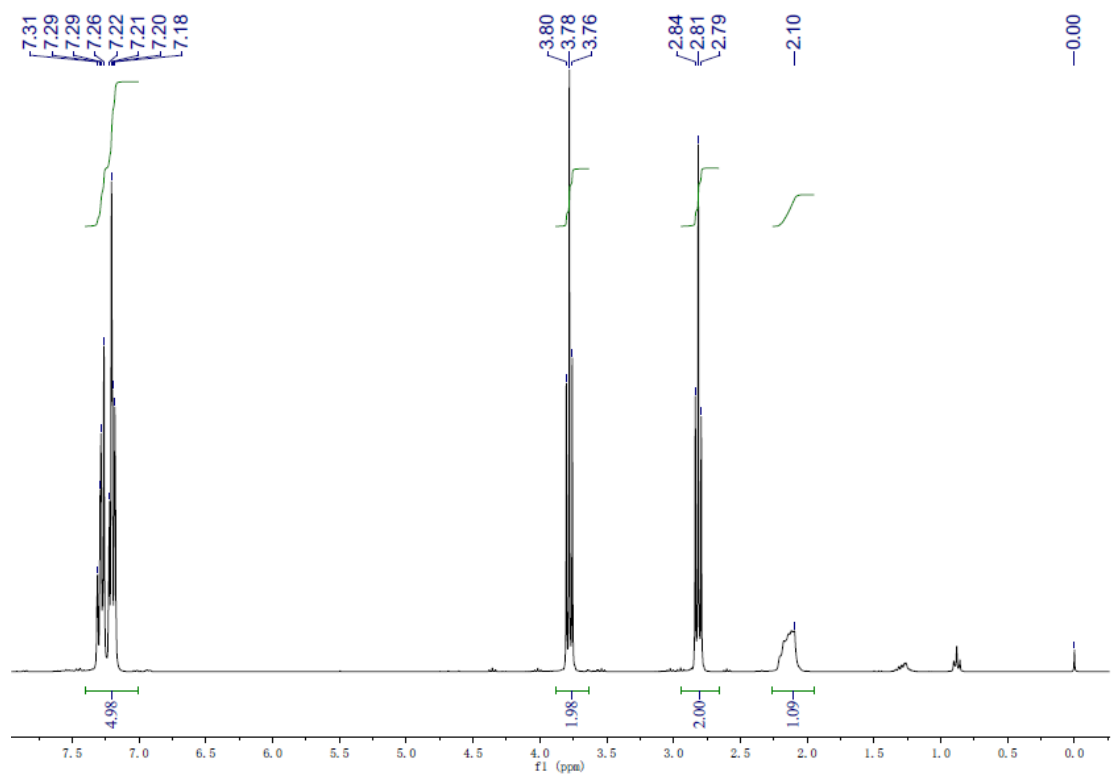

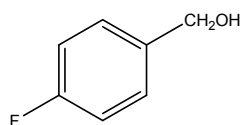

$^1\text{H NMR}$  (300 MHz,  $\text{CDCl}_3$ ,  $\delta$ ): 7.36–7.26 (m, *Ar*, 2H), 7.07–7.01 (m, *Ar*, 2H), 4.66 (s,  $\text{CH}_2$ , 2H), 1.74 (s, *OH*, 1H).

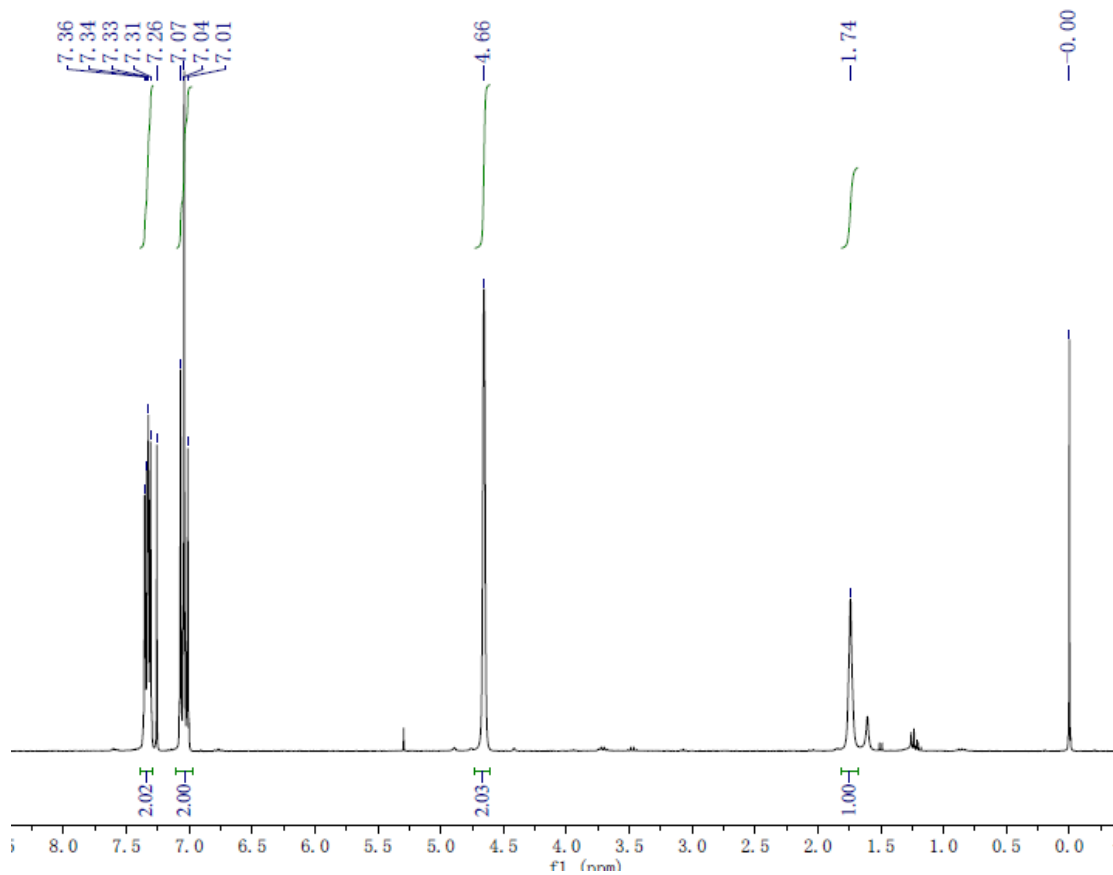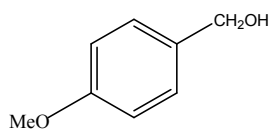

$^1\text{H NMR}$  (300 MHz,  $\text{CDCl}_3$ ,  $\delta$ ): 7.26 (d, *Ar*,  $^3J(\text{HH}) = 9.0$  Hz, 2H), 6.86 (d, *Ar*,  $^3J(\text{HH}) = 9.0$  Hz, 2H), 4.57 (s,  $\text{CH}_2$ , 2H), 3.79 (s,  $\text{OCH}_3$ , 3H), 2.11 (s br, *OH*, 1H).

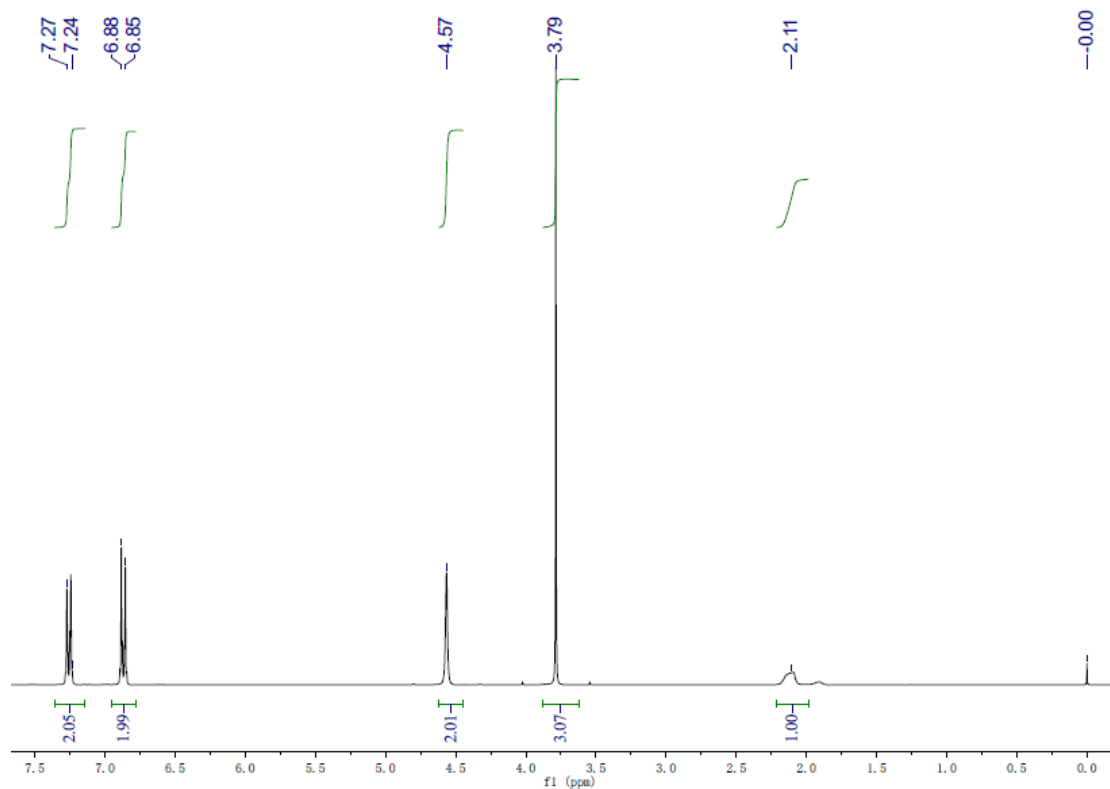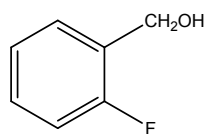

$^1\text{H}$  NMR (300 MHz,  $\text{CDCl}_3$ ,  $\delta$ ): 7.34–7.30 (m, *Ar*, 1H), 7.21–7.17 (m, *Ar*, 1H), 7.09–7.03 (m, *Ar*, 1H), 7.00–6.93 (m, *Ar*, 1H), 4.66 (s,  $\text{CH}_2$ , 2H), 2.05 (s, *OH*, 1H).

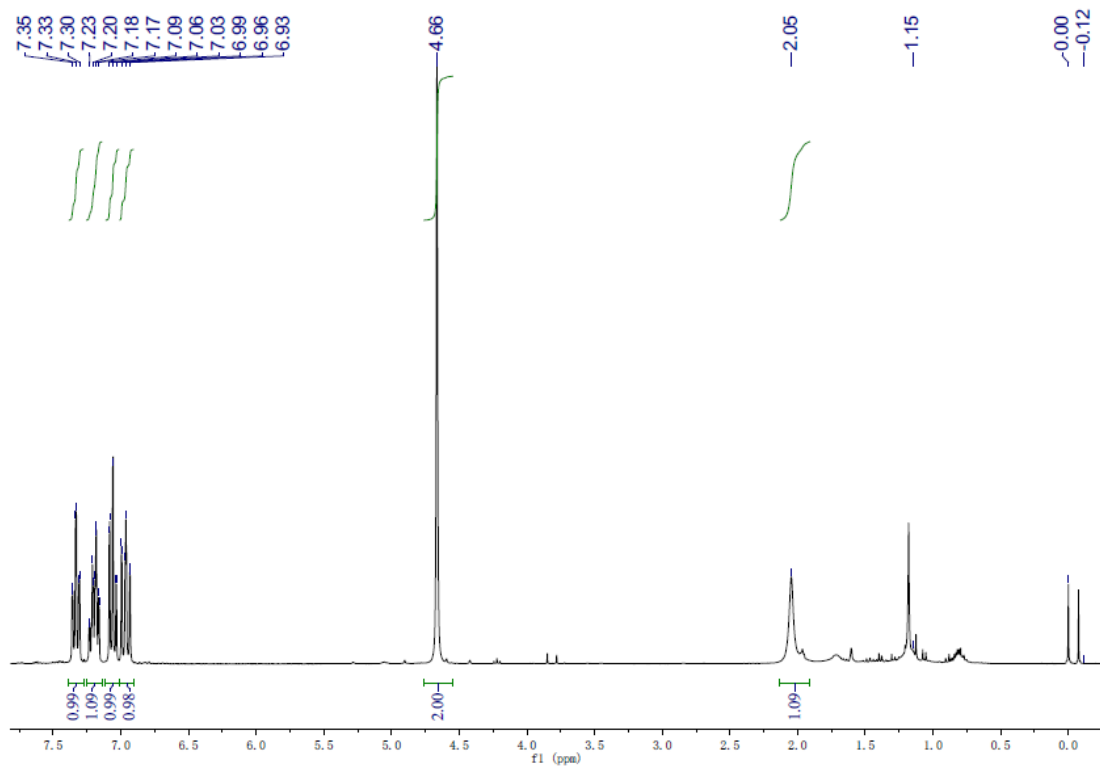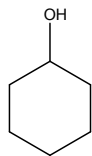

$^1\text{H}$  NMR (300 MHz,  $\text{CDCl}_3$ ,  $\delta$ ): 3.57–3.48 (m,  $\text{CHOH}$ , 1H), 2.15 (s, 1H), 1.82–1.79 (m, 2H), 1.68–1.66 (m, 2H), 1.50–1.46 (m, 1H), 1.28–1.07 (m, 5H).

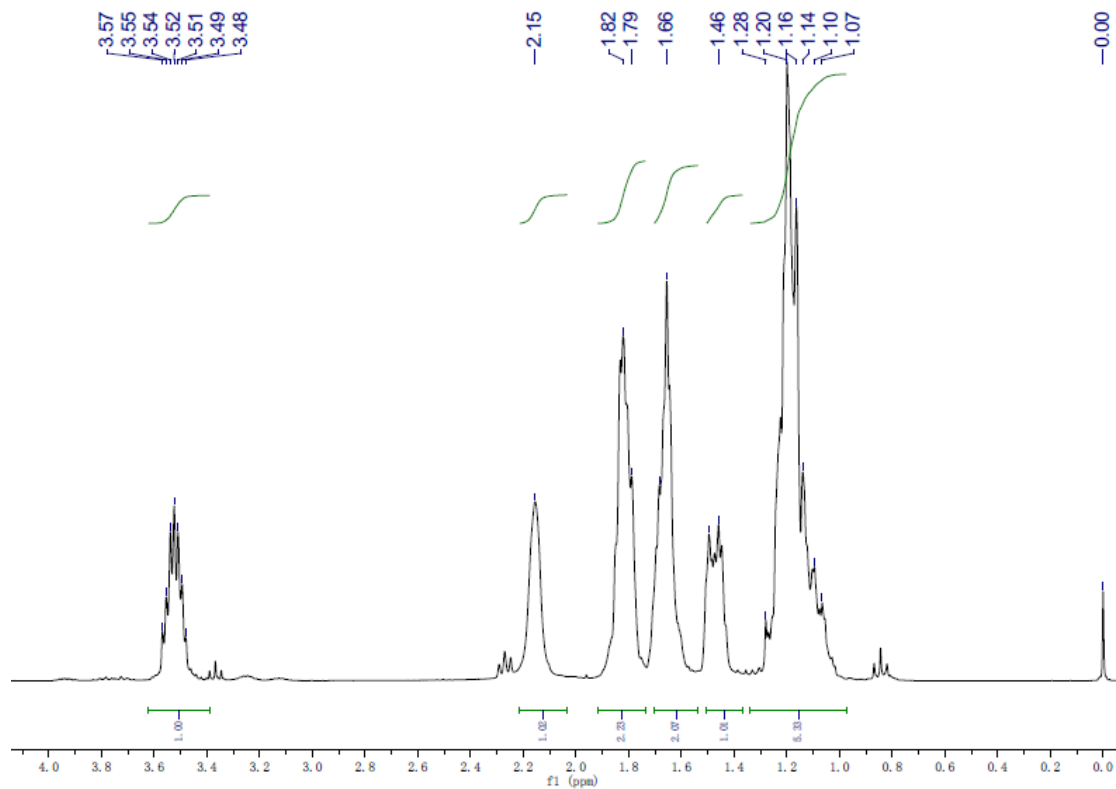

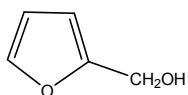

$^1\text{H}$  NMR (300 MHz,  $\text{CDCl}_3$ ,  $\delta$ ): 7.37 (br s, *Ar*, 1H), 6.25–6.32 (m, *Ar*, 2H), 4.53 (s,  $\text{CH}_2$ , 2H), 2.98 (s br, *OH*, 2H).

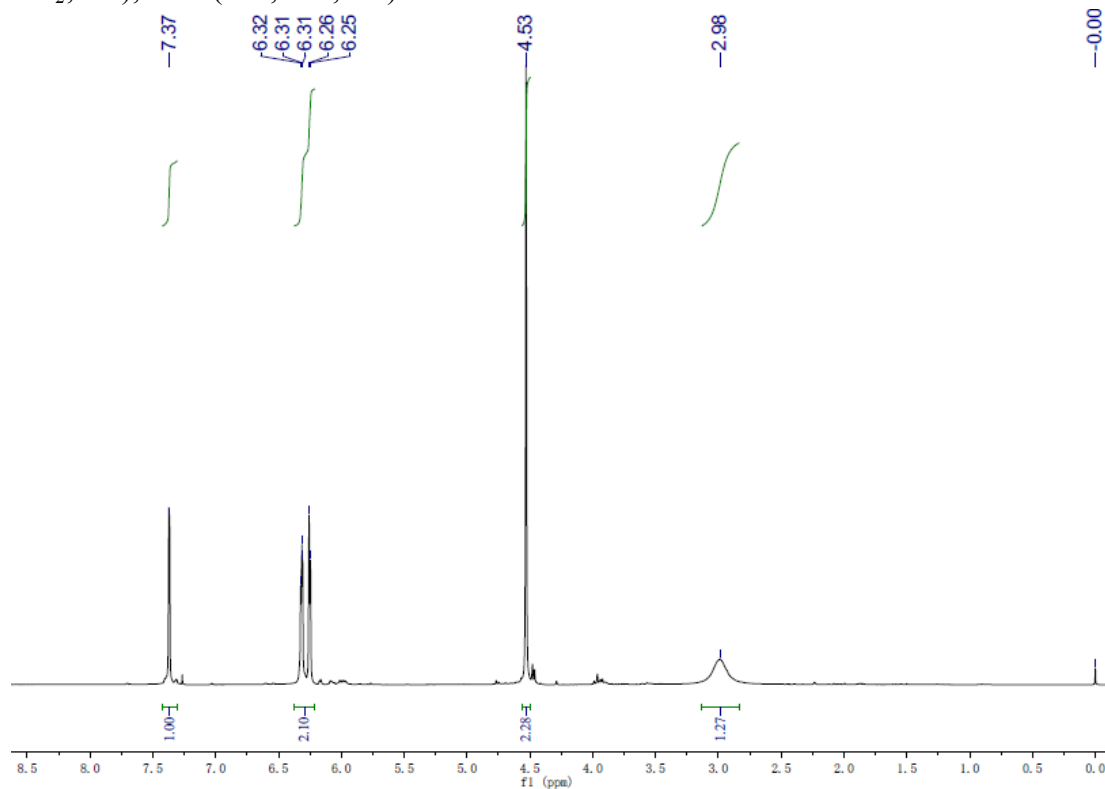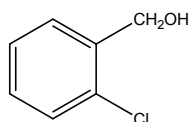

$^1\text{H}$  (300MHz,  $\text{CDCl}_3$ ,  $\delta$ ): 7.47-7.50 (m, *Ar*, 1H), 7.38-7.22 (m, *Ar*, 3H), 4.79 (d,  $\text{CH}_2$ , 2H,  $^3J(\text{HH}) = 6.0$  Hz), 1.97 (t, *OH*, 1H,  $^3J(\text{HH}) = 7.5$  Hz).

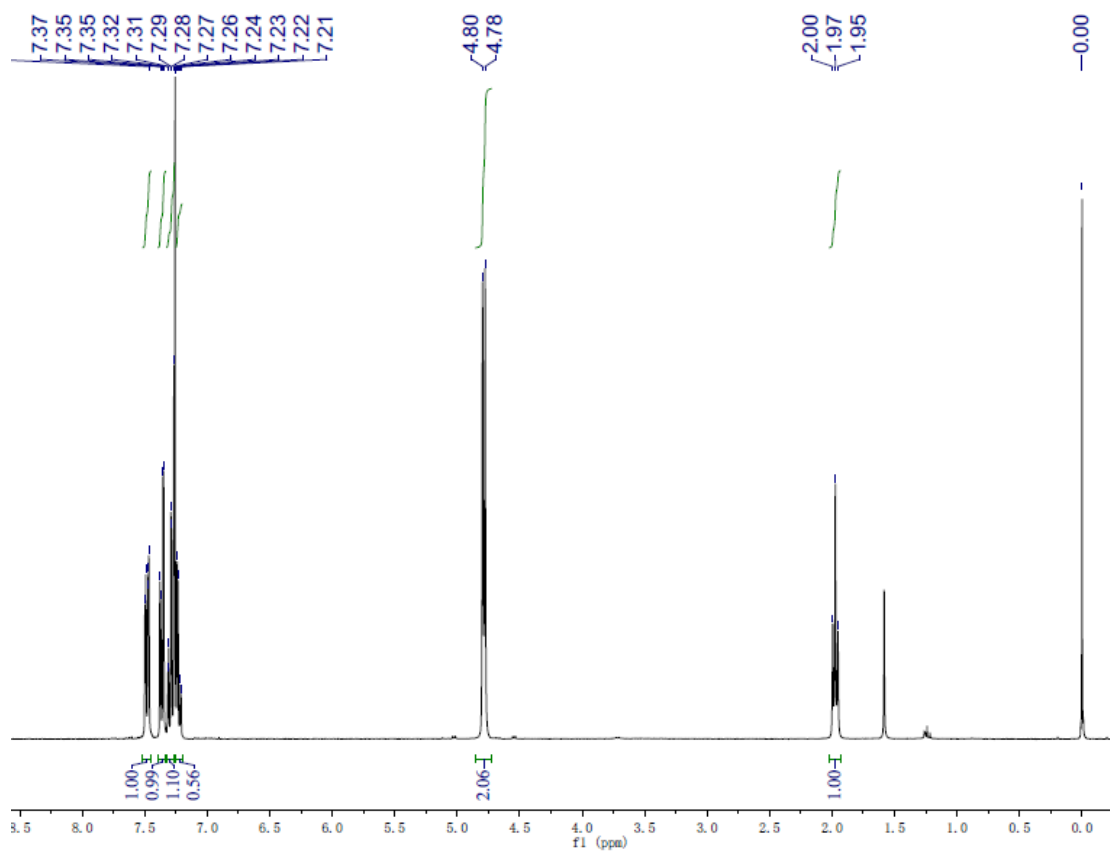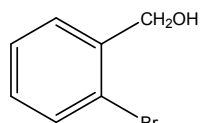

$^1\text{H}$  (300MHz,  $\text{CDCl}_3$ ,  $\delta$ ): 7.55-7.45 (m, *Ar*, 2H), 7.34-7.15 (m, *Ar*, 2H), 4.72 (s,  $\text{CH}_2$ , 2H), 2.31 (s, *OH*, 1H).

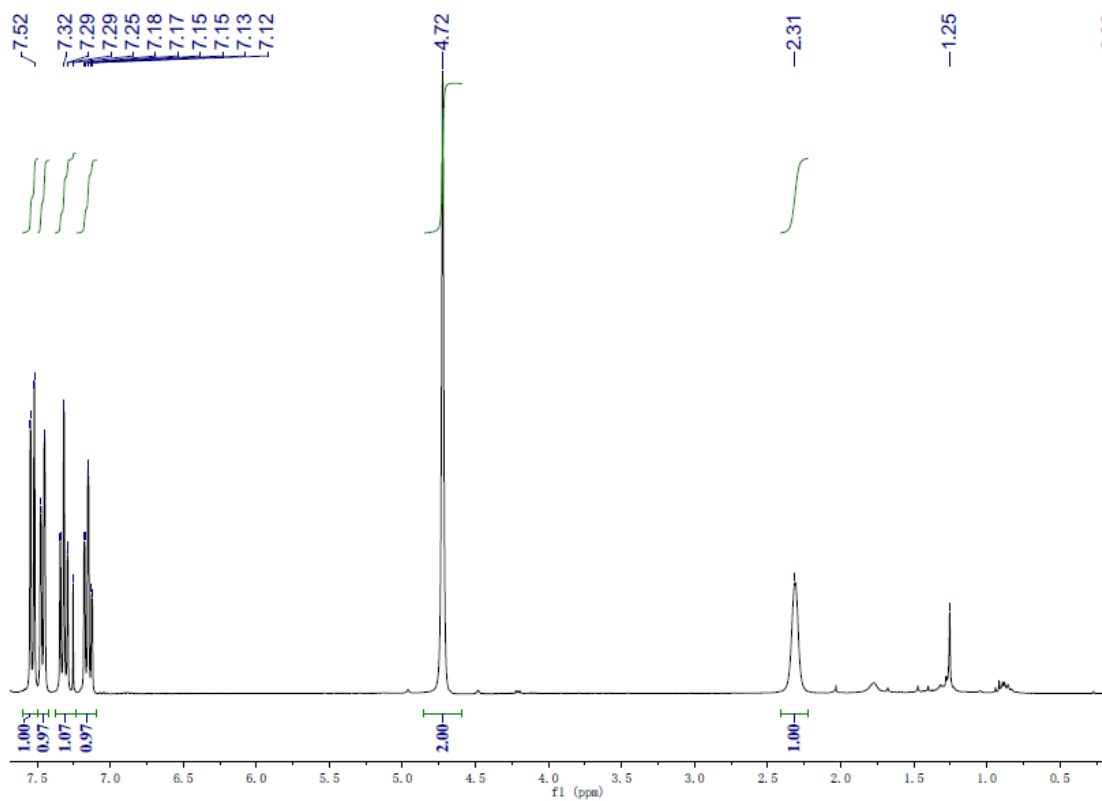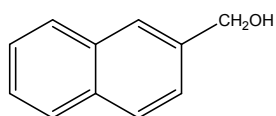

$^1\text{H}$  NMR (300 MHz,  $\text{CDCl}_3$ ,  $\delta$ ): 8.12–8.09 (d, *Ar*, 1H), 7.88–7.79 (dd, *Ar*, 2H), 7.54–7.43 (m, *Ar*, 4H), 5.12 (s,  $\text{CH}_2$ , 2H), 1.88 (s, *OH*, 1H).

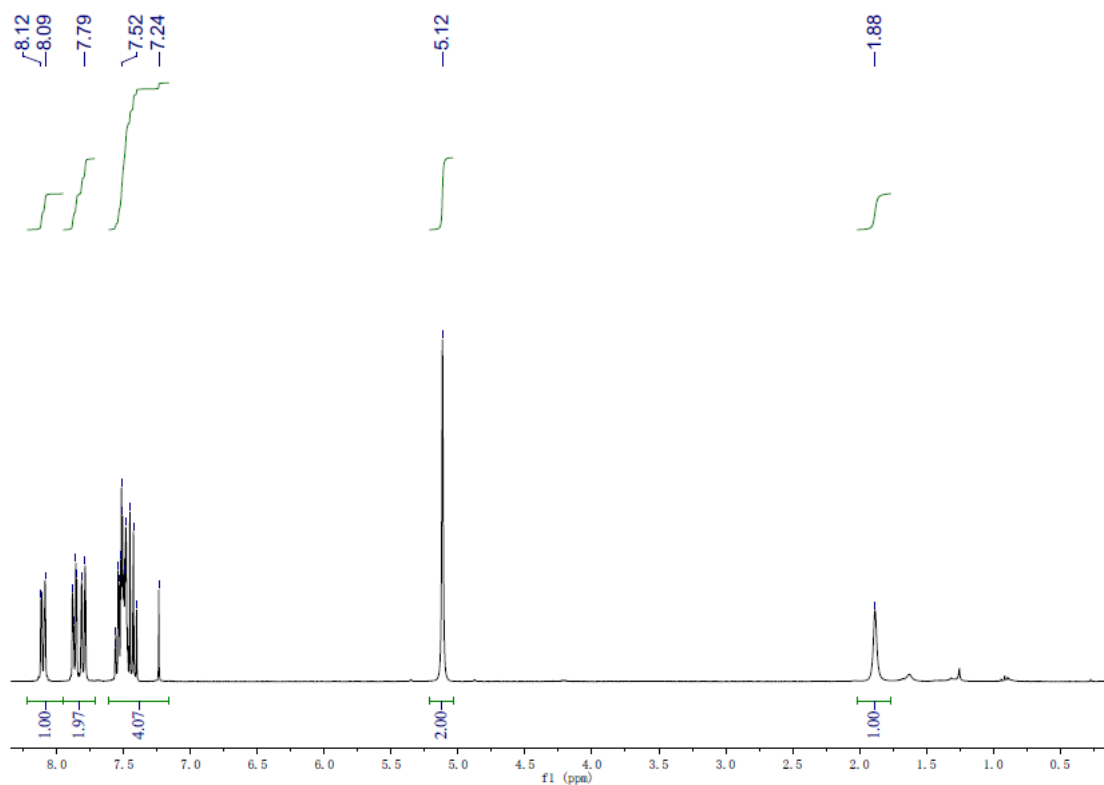



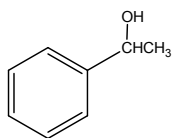

$^1\text{H NMR}$  (300 MHz,  $\text{CDCl}_3$ ,  $\delta$ ): 7.31–7.21 (m, *Ar*, 5H), 4.79 (q, *CHOH*,  $^3J(\text{HH}) = 6.0$  Hz, 1H), 2.65 (s br, *OH*, 1H), 1.42 (d, *CH*<sub>3</sub>,  $^3J(\text{HH}) = 6.0$  Hz, 3H).

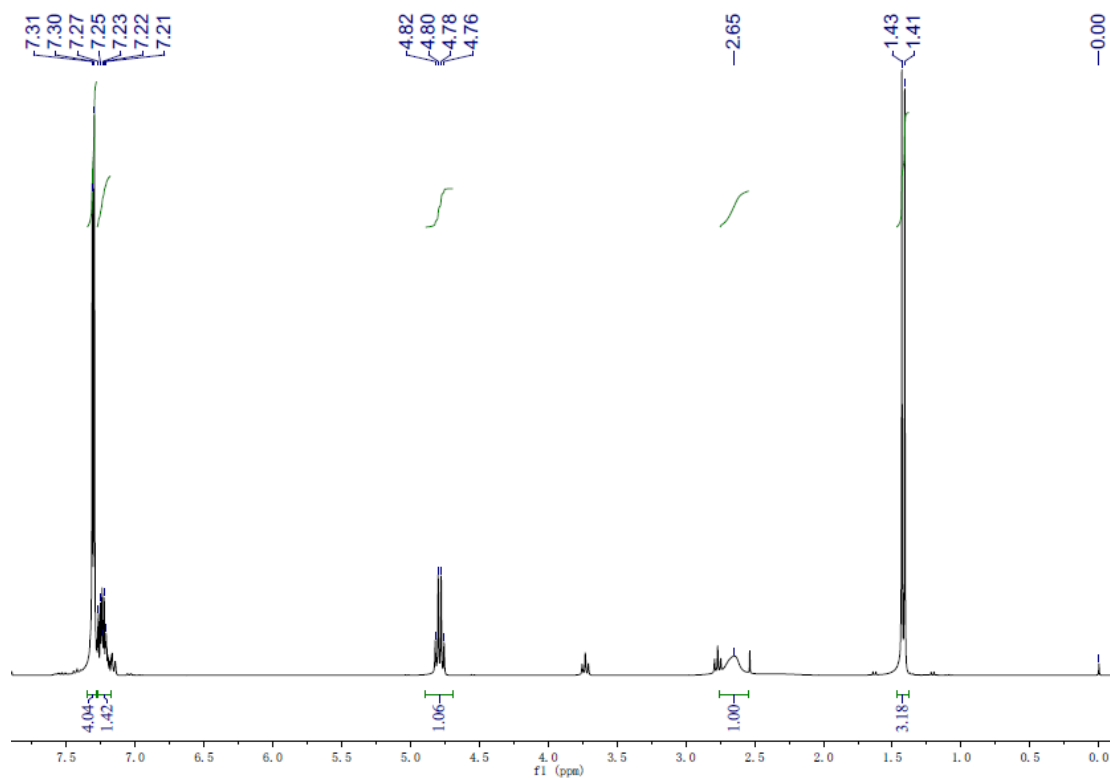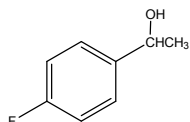

$^1\text{H NMR}$  (300 MHz,  $\text{CDCl}_3$ ,  $\delta$ ): 7.31–7.27 (m, *Ar*, 2H), 7.26–6.97 (m, *Ar*, 2H), 4.82 (q, *CHOH*,  $^3J(\text{HH}) = 6.0$  Hz, 1H), 2.54 (s, *OH*, 1H), 1.43 (d, *CH*<sub>3</sub>,  $^3J(\text{HH}) = 6.0$  Hz, 3H).

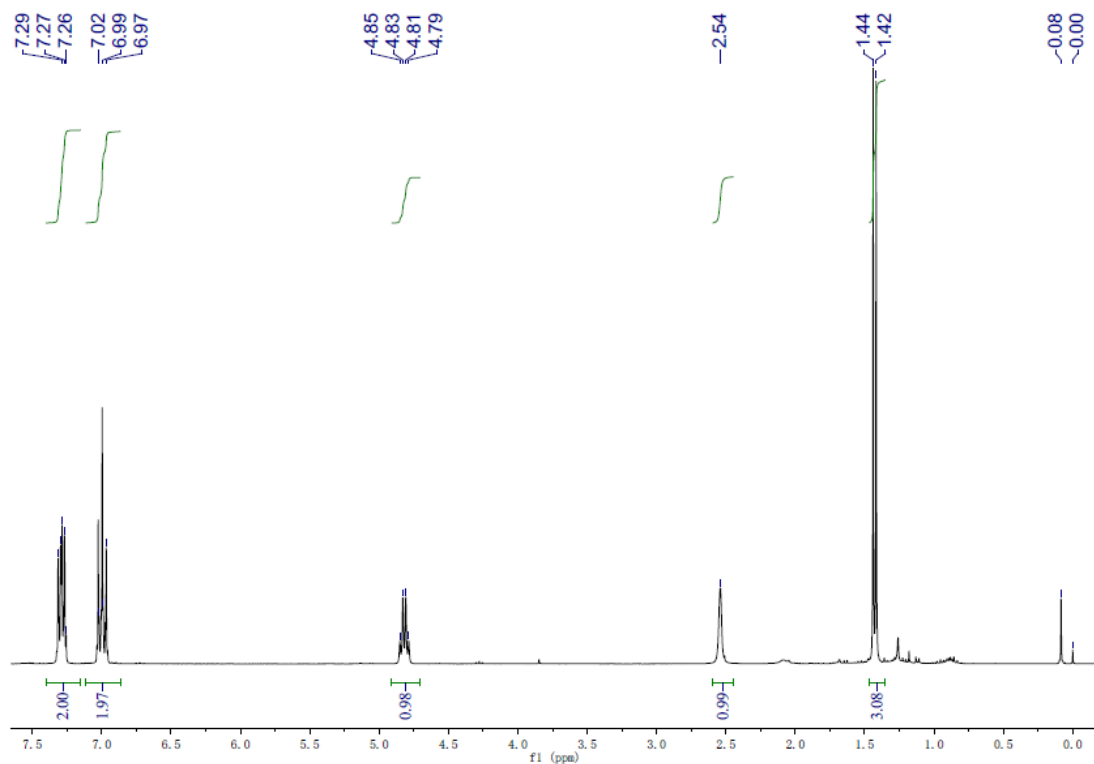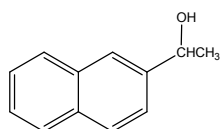

$^1\text{H}$  NMR (300 MHz,  $\text{CDCl}_3$ ,  $\delta$ ): 7.85–7.81 (m, *Ar*, 4H), 7.52–7.45 (m, *Ar*, 3H), 5.07 (m, *CHOH*, 1H), 1.92 (s, *OH*, 1H), 1.58 (d, *CH*<sub>3</sub>,  $^3J(\text{HH}) = 6.0$  Hz, 3H).

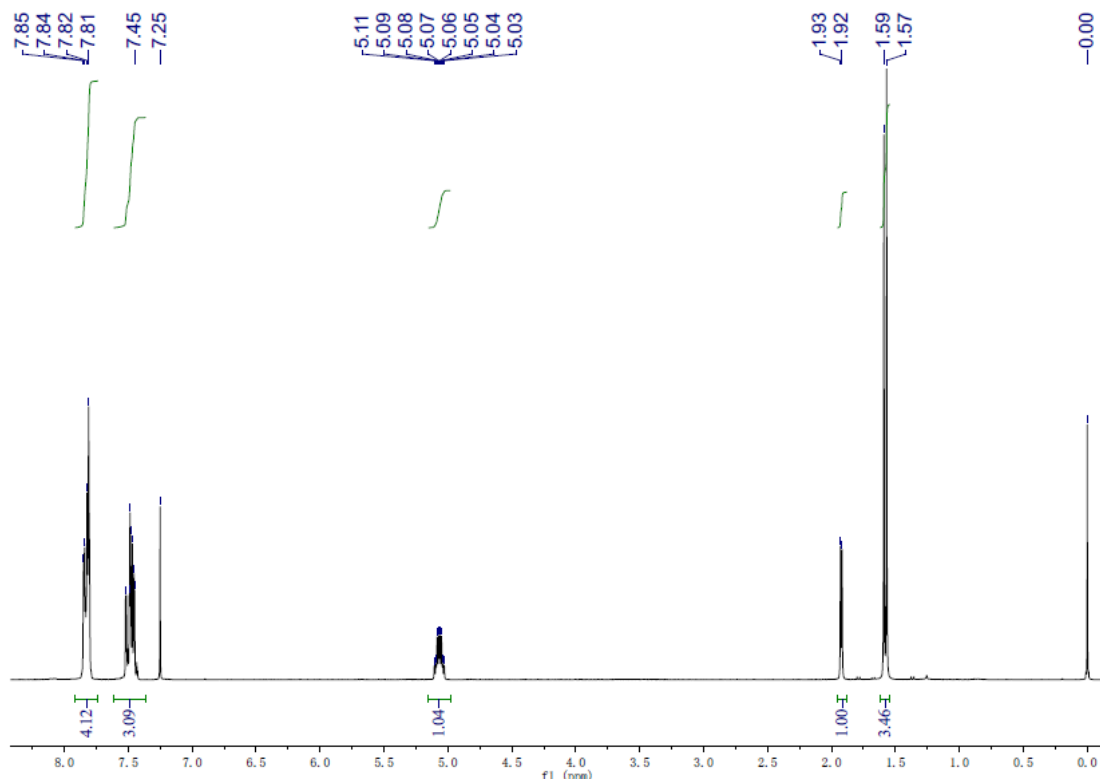

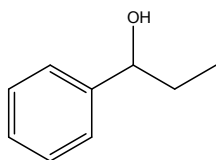

$^1\text{H}$  NMR (300 MHz,  $\text{CDCl}_3$ ,  $\delta$ ): 7.35-7.22 (m, *Ar*, 5H), 4.55 (t, *CHOH*, 1H,  $^3J(\text{HH}) = 6.0\text{Hz}$ ), 2.14 (s, *OH*, 1H), 1.76 (m,  $\text{CH}_2\text{CH}_3$ , 2H), 0.89 (t,  $\text{CH}_2\text{CH}_3$ , 3H,  $^3J(\text{HH}) = 7.5\text{Hz}$ ).

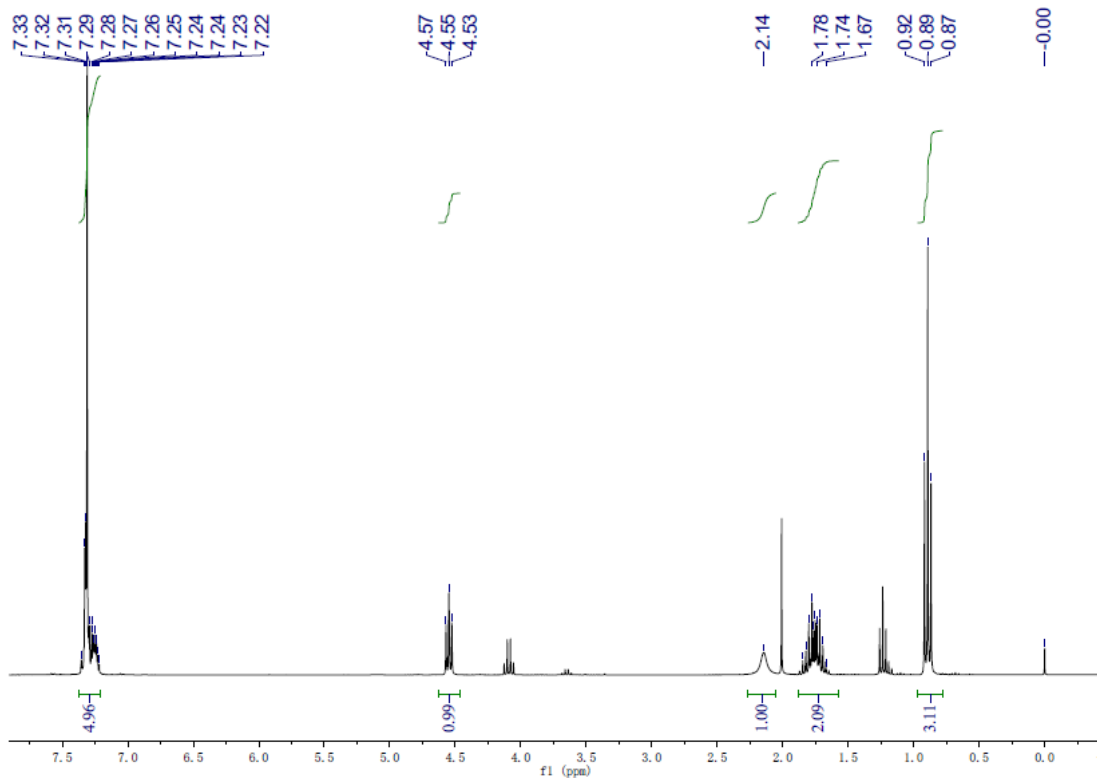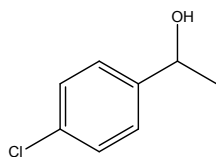

$^1\text{H}$  NMR (300 MHz,  $\text{CDCl}_3$ ,  $\delta$ ): 7.26-7.31 (m, *Ar*, 4H), 4.88 (q, *CHOH*, 1H,  $^3J(\text{HH}) = 6.0\text{Hz}$ ), 1.89 (s, *OH*, 1H), 1.47 (d,  $\text{CHCH}_3$ , 3H,  $^3J(\text{HH}) = 3.0\text{Hz}$ ).

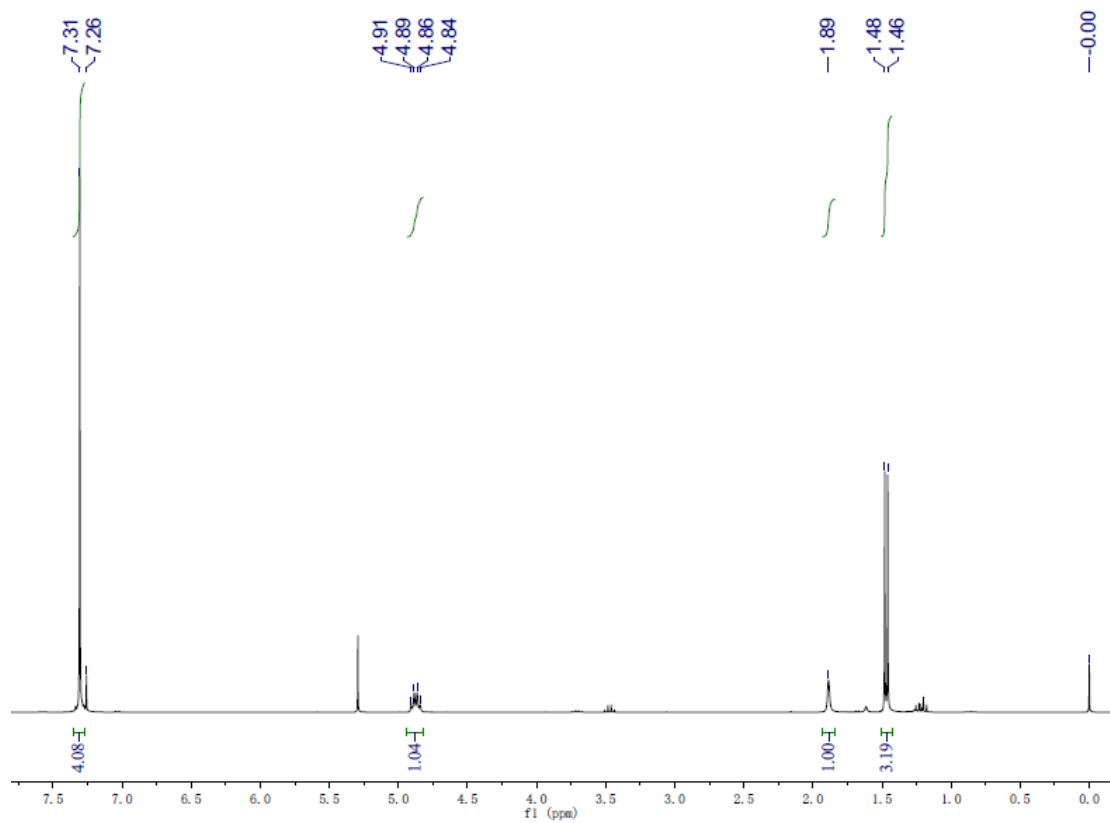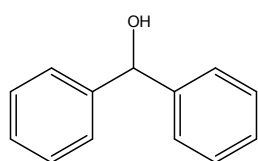

$^1\text{H}$  NMR (300 MHz,  $\text{CDCl}_3$ ,  $\delta$ ):  $\delta$  7.18-7.32 (m, Ar, 10H), 5.78 (s,  $\text{CH}(\text{OH})$ , 1H), 2.16 (s br,  $\text{CH}(\text{OH})$ , 1H).

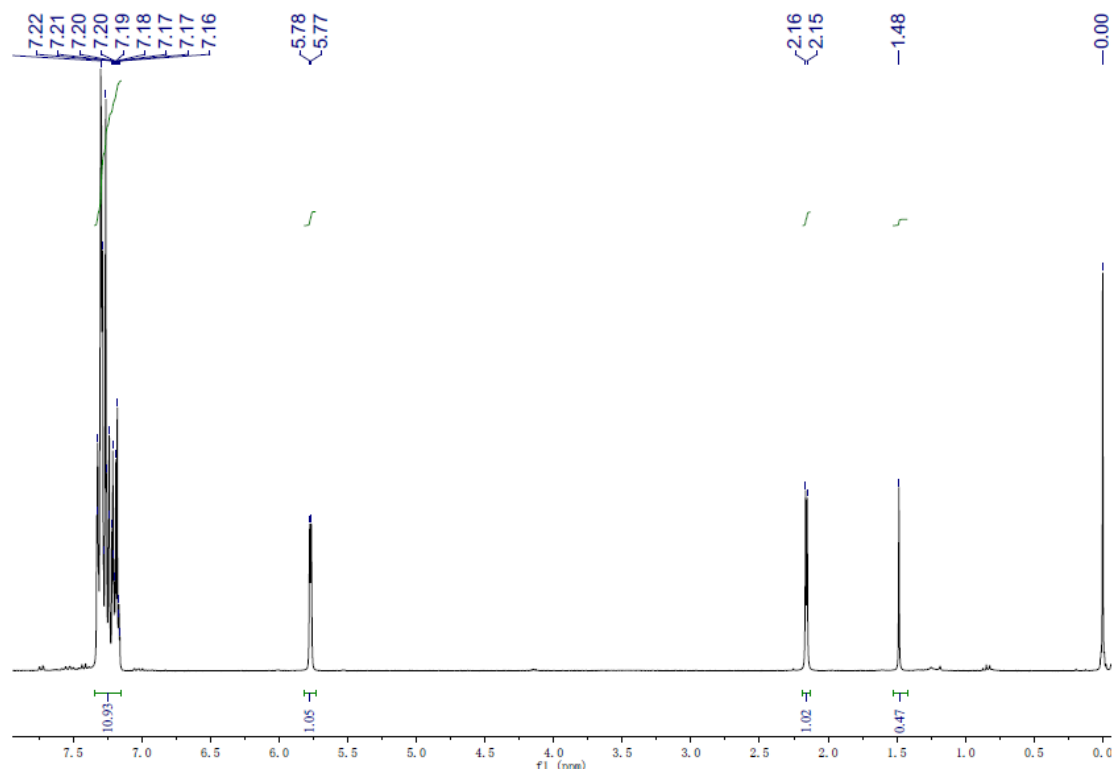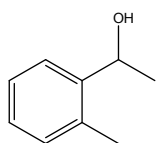

$^1\text{H}$  NMR (300 MHz,  $\text{CDCl}_3$ ,  $\delta$ ): 7.47-7.44 (m, *Ar*, 1H), 7.22-7.07 (m, *Ar*, 3H), 5.03 (q, *CHOH*,  $^3J(\text{HH})=6.0\text{Hz}$ , 1H), 2.29 (s,  $\text{CH}_3$ , 3H), 1.40 (d,  $\text{CHCH}_3$ ,  $^3J(\text{HH}) = 6.0\text{Hz}$ , 3H).

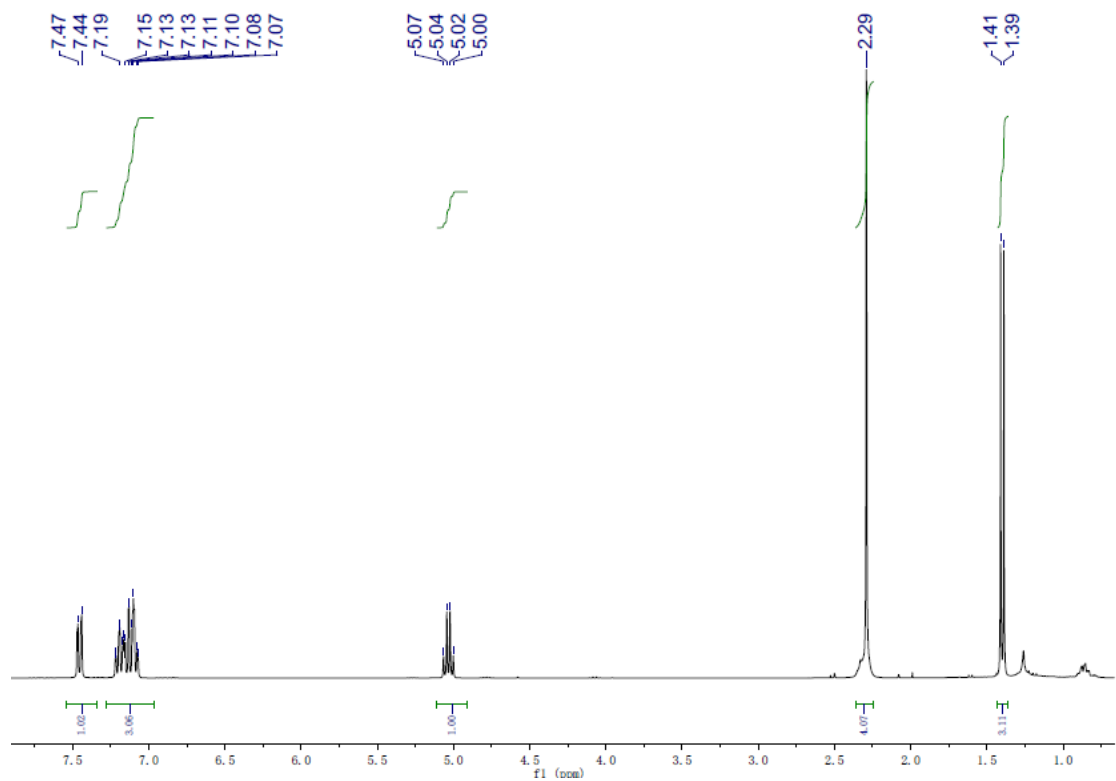

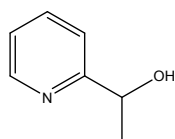

$^1\text{H}$  NMR (300 MHz,  $\text{CDCl}_3$ ,  $\delta$ ): 8.54 (d, *Ar*,  $^3J(\text{HH}) = 3.0$  Hz, 1H), 7.72–7.66 (m, *Ar*, 1H), 7.29 (d, *Ar*,  $^3J(\text{HH}) = 9.0$  Hz, 1H), 7.22–7.18 (m, *Ar*, 1H), 4.89 (q, *CHOH*,  $^3J(\text{H-H}) = 6.0$  Hz, 1H), 4.31 (s br, *OH*, 1H), 1.51 (d, *CH<sub>3</sub>*,  $^3J(\text{H-H}) = 6.0$  Hz, 3H).

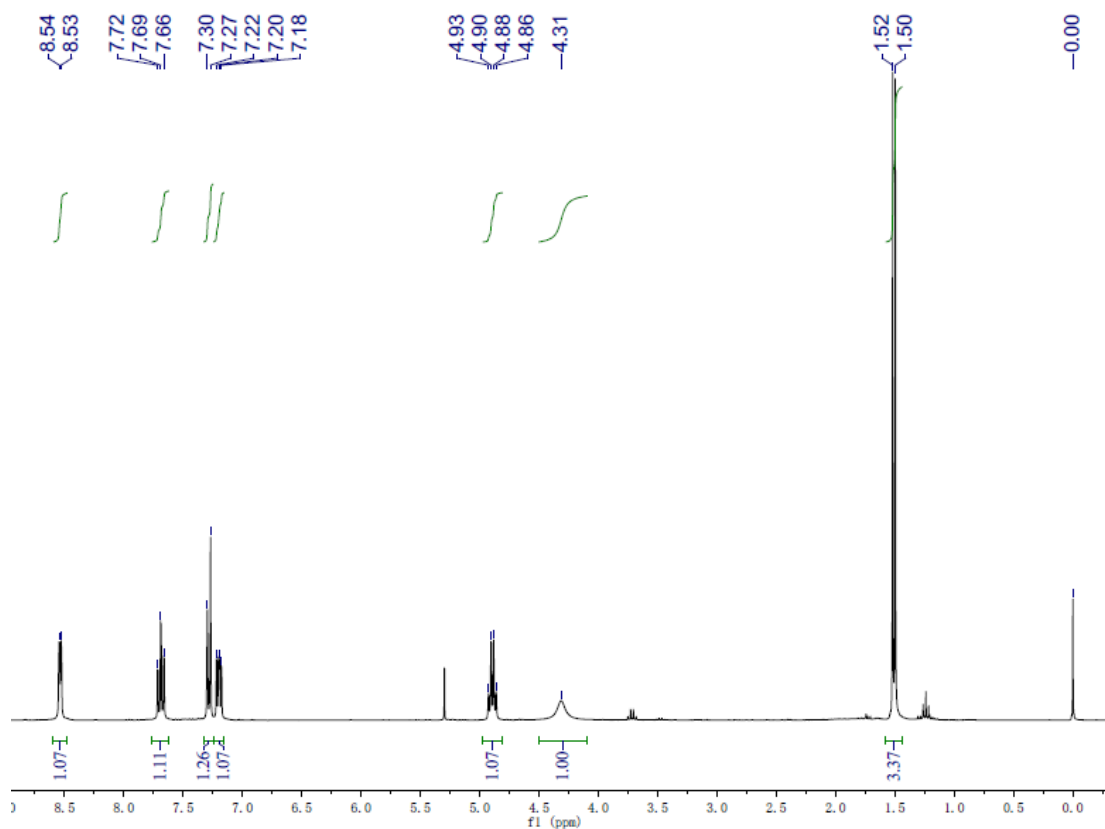

### Magnetic susceptibility of complex 3

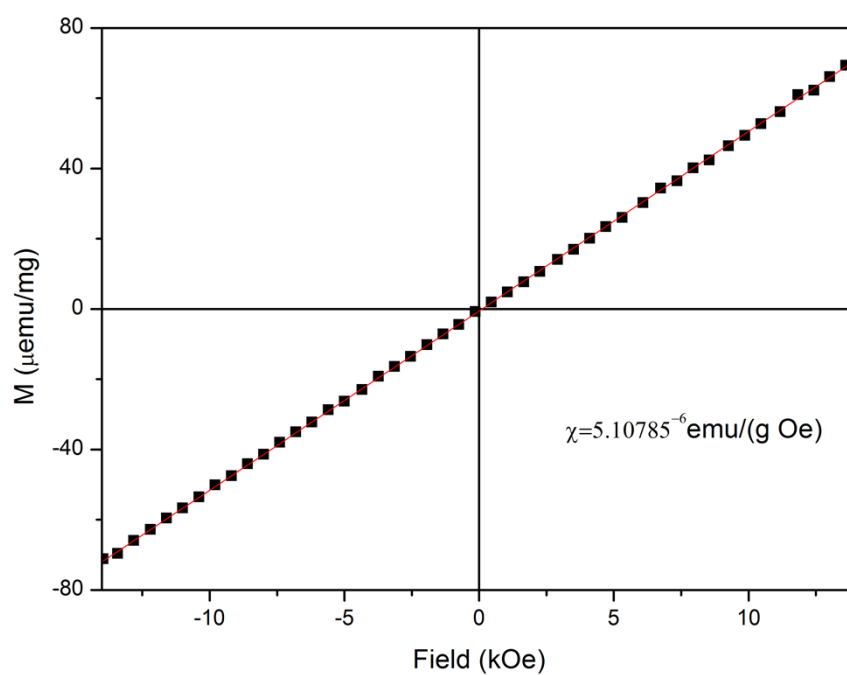

$$\chi_m = 20\pi \cdot 10^{-9} \text{ m}^3 \text{ mol}^{-1}$$

$$\mu_m = 3.16 \cdot 10^{-23} \text{ JT}^{-1}$$

$$n = 2.54$$
